# Supplementary material
Source: PubMed Central journal article supplement (PMC10688025)

Supplemental Materials for Schwartz et al.

**Fig. S1- CONSORT flow diagram of study patients.** Among the 23 patients consented for study participation, 19 were considered evaluable.

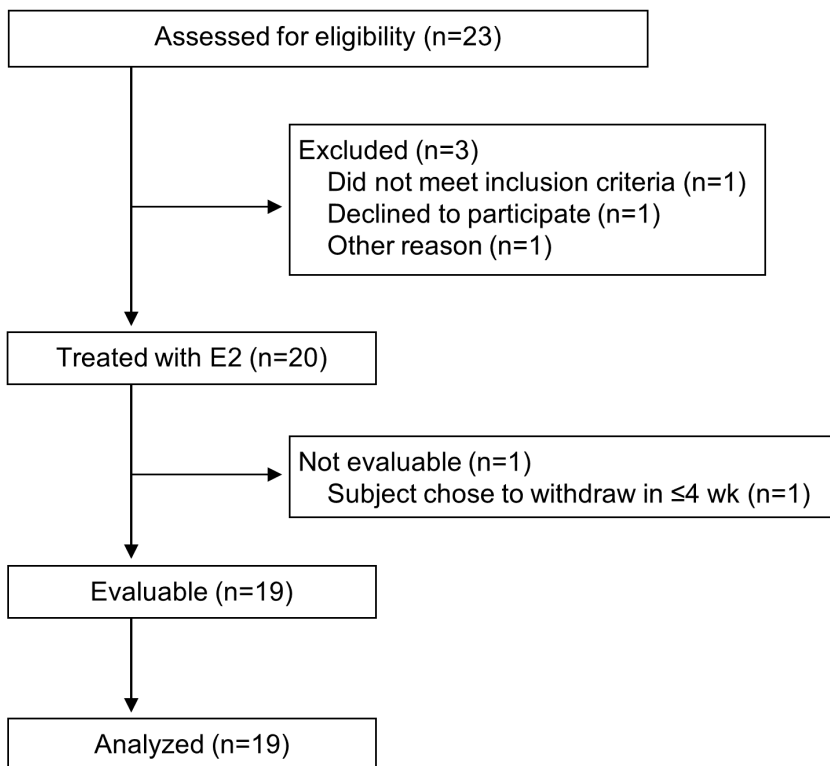

Supplement: NIHMS1922888-supplement-Supplemental_Figures.pdf [file NIHMS1922888-supplement-Supplemental_Figures.pdf]
